# Supplementary material
Source: publisher figshare collection journal article supplement (https://sage.figshare.com/ndownloader/files/15543164)
Supplement: Supplementary file 1 [file 15543164]

## 2012 Convention Delegate Study

This codebook includes the variable number (q\_) for each variable and the numerical codes for certain variables.

**caseid** = unique ID for each respondent

**party** = 1 for Republicans, 2 for Democrats

**mail** = 1 for all respondents completing mail survey, otherwise took online

This is a survey of the political views of delegates to the 2012 national party conventions. Your input is very important to us.

We take great care to preserve the confidentiality of our study participants. The information from completed questionnaires is reported only in summary statistical form, thereby ensuring confidentiality of responses. Your responses will NEVER be linked to your name. In fact, we will never ask you for your name or to provide any information that would identify you.

By clicking on the button below, you are acknowledging that you were a delegate to the 2012 Republican/Democratic National Convention, and that you agree to participate in this study.  
Thank you for taking the time to complete this survey.

☐ I agree to participate in the 2012 Convention Delegate Study. Take me to the survey.

**q1** = 1 for all respondents (clicked on agree or mailed in survey)

**q2:** First, what was your **official classification** as a delegate in 2012? (*Select only one*)

**Democrats:**

- ☐ Congressional district (1)
- ☐ At-large (2)
- ☐ Super delegate (3)

**Republicans:**

- ☐ Congressional district (1)
- ☐ At-large (2)

Please indicate in **which years** you were a delegate to a national convention. (*Separate variable for each year, equals 1 if respondent chose*)

(*Please check all that apply*)

|                             |                          |                      |                          |                      |                          |
|-----------------------------|--------------------------|----------------------|--------------------------|----------------------|--------------------------|
| Before 1996 ( <b>q3_3</b> ) | <input type="checkbox"/> | 2000 ( <b>q3_5</b> ) | <input type="checkbox"/> | 2008 ( <b>q3_7</b> ) | <input type="checkbox"/> |
| 1996 ( <b>q3_4</b> )        | <input type="checkbox"/> | 2004 ( <b>q3_6</b> ) | <input type="checkbox"/> | 2012 ( <b>q3_8</b> ) | <input type="checkbox"/> |

**q4:** How old were you when you first became active in politics? \_\_\_\_\_ years old

**q5:** Please choose the number that best describes how strongly you **support your political party** (*Sliding scale between 1 and 7, mail survey just whole numbers*)

**Not Very  
Strong**

**Very  
Strong**

**1**

**2**

**3**

**4**

**5**

**6**

**7**

## 2012 Convention Delegate Study

How would you compare the importance of your party activity with your involvement in these other kinds of activity? Would you say your party work is: **1) More Important, 2) About as Important, or 3) Less Important:**

**Rate:**

**q6\_1:** Activity on behalf of a demographic group (e.g. gender, race, ethnicity, etc.)

**q6\_2:** Activity on behalf of a geographic place (e.g. your state, community, neighborhood, etc.)

**q6\_3:** Activity on behalf of a religious group (e.g. Evangelical Christian, Catholic, Jewish, Muslims, etc.)

**q6\_4:** Activity on behalf of my occupation (e.g. Labor Union, Business Group, Teacher's Union, Professional Association, etc.)

**q6\_5:** Activity on behalf of an issue or broad ideological group (e.g. conservative groups, liberal groups, Environmental Rights, Gun Rights, etc.)

We are interested in people's **reasons for being involved in politics**. How important is each of the following reasons for your own participation in politics? (*Choose one in each row*)

|                                                                                                    |                          | (1) Not at all important | (2) Not very important   | (3) Quite important      | (4) Extremely important  |
|----------------------------------------------------------------------------------------------------|--------------------------|--------------------------|--------------------------|--------------------------|--------------------------|
| <b>q7_1:</b> Personal friends or members of my family are active in the party .....                | <input type="checkbox"/> |
| <b>q7_2:</b> I want to see particular candidates elected .....                                     | <input type="checkbox"/> |
| <b>q7_3:</b> Party work helps me make business or professional contacts .....                      | <input type="checkbox"/> |
| <b>q7_5:</b> I am strongly attached to the party and I want to give it my support .....            | <input type="checkbox"/> |
| <b>q7_6:</b> I enjoy the friendships and social contacts I have in the party .....                 | <input type="checkbox"/> |
| <b>q7_7:</b> I like the fun and excitement of conventions and campaigns .....                      | <input type="checkbox"/> |
| <b>q7_8:</b> I want to have a personal career in politics .....                                    | <input type="checkbox"/> |
| <b>q7_9:</b> I want to get the party and its candidates to support the policies I believe in ..... | <input type="checkbox"/> |
| <b>q7_12:</b> I want to advance the goals of groups/associations I belong to.....                  | <input type="checkbox"/> |

All of you have attended at least one national presidential nominating convention. In thinking about decisions made at conventions, how do feel about the following statements?

|                                                                                                                | Disagree<br>Strongly<br>(1) | Disagree<br>(2)          | Agree<br>(3)             | Agree<br>Strongly<br>(4) |
|----------------------------------------------------------------------------------------------------------------|-----------------------------|--------------------------|--------------------------|--------------------------|
| It is best to minimize disagreement within the party ( <b>q8_1</b> )                                           | <input type="checkbox"/>    | <input type="checkbox"/> | <input type="checkbox"/> | <input type="checkbox"/> |
| One should stand firm for a position even if it means resigning from the party ( <b>q8_2</b> )                 | <input type="checkbox"/>    | <input type="checkbox"/> | <input type="checkbox"/> | <input type="checkbox"/> |
| The party should play down some issues if it will improve the chances of winning. ( <b>q8_3</b> )              | <input type="checkbox"/>    | <input type="checkbox"/> | <input type="checkbox"/> | <input type="checkbox"/> |
| The party should select a nominee who is strongly committed on the issues. ( <b>q8_4</b> )                     | <input type="checkbox"/>    | <input type="checkbox"/> | <input type="checkbox"/> | <input type="checkbox"/> |
| Choosing a candidate with broad electoral appeal is more important than a consistent ideology. ( <b>q8_5</b> ) | <input type="checkbox"/>    | <input type="checkbox"/> | <input type="checkbox"/> | <input type="checkbox"/> |

## **2012 Convention Delegate Study**

Next, we would like to know how you feel about the decisions made by your party's elected officials. Please place yourself on the scale between the two opposing positions. (sliders on 1-7 scales, mail responses whole numbers)

**q9 = 1 for all respondents who clicked "next" here.**

**q10:**

**Elected officials should  
stand up for their principles  
no matter what.**

**Elected officials should  
compromise with their opponents  
in order to get things done for the  
country..**

-----|-----

**q11:**

**When making decisions on  
important issues, elected  
officials should represent the  
views of the voters in their  
states and districts.**

**When making decisions on  
important issues, elected  
officials should represent the  
core principles of and the  
core groups in their party.**

-----|-----

Please indicate whether you were involved in each of the following presidential campaigns (separate variable for each year, equals 1 if respondent chose)

2000 (**q12\_1**)..... ☐

2004 (**q12\_2**) ..... ☐

2008 (**q12\_3**)..... ☐

2012 (**q12\_4**)..... ☐

What types of activities did you engage in during the **2012 presidential campaign**? Please check all of the activities in which you were involved. (Separate variable for each activity, equals 1 if respondent chose)

|                                                        |                          |               |
|--------------------------------------------------------|--------------------------|---------------|
| Voter registration/get out the vote drives             | <input type="checkbox"/> | <b>q13_1</b>  |
| Telephoning .....                                      | <input type="checkbox"/> | <b>q13_2</b>  |
| Distributing literature/putting up signs .....         | <input type="checkbox"/> | <b>q13_3</b>  |
| Fund raising .....                                     | <input type="checkbox"/> | <b>q13_4</b>  |
| Mass mailing .....                                     | <input type="checkbox"/> | <b>q13_5</b>  |
| Media or internet production/publicity .....           | <input type="checkbox"/> | <b>q13_6</b>  |
| Social media.....                                      | <input type="checkbox"/> | <b>q13_7</b>  |
| Poll watching .....                                    | <input type="checkbox"/> | <b>q13_8</b>  |
| Campaign organization/campaign office .....            | <input type="checkbox"/> | <b>q13_9</b>  |
| Rallies/campaign events.....                           | <input type="checkbox"/> | <b>q13_10</b> |
| Small meetings/teas/coffees.....                       | <input type="checkbox"/> | <b>q13_11</b> |
| Blogging ( <i>not an option on mail survey</i> ) ..... | <input type="checkbox"/> | <b>q13_12</b> |

## 2012 Convention Delegate Study

Please indicate how much of your activity in the 2012 presidential campaign was **motivated by commitments** to the party, to a candidate, or to an issue position or specific group. *(Please choose one box in each row.)*

|                                                                  | None (1)                 | Some (2)                 | A lot (3)                |
|------------------------------------------------------------------|--------------------------|--------------------------|--------------------------|
| I was committed to party work (q14_1)                            | <input type="checkbox"/> | <input type="checkbox"/> | <input type="checkbox"/> |
| I wanted to help a particular candidate (q14_2)                  | <input type="checkbox"/> | <input type="checkbox"/> | <input type="checkbox"/> |
| I wanted to work for an issue position or specific group (q14_3) | <input type="checkbox"/> | <input type="checkbox"/> | <input type="checkbox"/> |

We hear a lot of talk these days about liberals and conservatives. Here is a seven-point scale on which the political views that people might hold are arranged from extremely liberal to extremely conservative.

**q15=1 for all respondents reaching this point in the survey**

First, where would you place yourself on this scale? Then, we're interested in where you would place other persons and groups on this scale. *(Sliding scale between 1 and 7, only whole numbers for mail respondents)*

|        |                               | Extremely Liberal |   | Moderate |   |   | Extremely Conservative |   |
|--------|-------------------------------|-------------------|---|----------|---|---|------------------------|---|
|        |                               | 1                 | 2 | 3        | 4 | 5 | 6                      | 7 |
| q16_1  | Yourself                      |                   |   |          |   |   |                        |   |
| q16_2  | Barack Obama                  | 1                 | 2 | 3        | 4 | 5 | 6                      | 7 |
| q16_3  | Mitt Romney                   | 1                 | 2 | 3        | 4 | 5 | 6                      | 7 |
| q16_4  | The national Democratic party | 1                 | 2 | 3        | 4 | 5 | 6                      | 7 |
| q16_5  | The national Republican party | 1                 | 2 | 3        | 4 | 5 | 6                      | 7 |
| q16_15 | The national electorate       | 1                 | 2 | 3        | 4 | 5 | 6                      | 7 |

Now, I have some questions about different groups in our society. Where would you rate whites, blacks, and Hispanic Americans on the following scales? *(Sliding scales between 1 and 7, only whole numbers for mail respondents)*

(q17\_1) Whites:

|                     |   |   |   |   |   |             |
|---------------------|---|---|---|---|---|-------------|
| <b>Hard working</b> |   |   |   |   |   | <b>Lazy</b> |
| 1                   | 2 | 3 | 4 | 5 | 6 | 7           |

(q17\_2) Blacks:

|                     |   |   |   |   |   |             |
|---------------------|---|---|---|---|---|-------------|
| <b>Hard working</b> |   |   |   |   |   | <b>Lazy</b> |
| 1                   | 2 | 3 | 4 | 5 | 6 | 7           |

(q17\_3) Hispanic Americans:

|                     |   |   |   |   |   |             |
|---------------------|---|---|---|---|---|-------------|
| <b>Hard working</b> |   |   |   |   |   | <b>Lazy</b> |
| 1                   | 2 | 3 | 4 | 5 | 6 | 7           |

## 2012 Convention Delegate Study

Here is a different scale. Where would you rate whites, blacks, and Hispanic Americans on the following scale? (*Sliding scales between 1 and 7, only whole numbers for mail respondents. Note that some mail respondents were presented with "hard working vs. lazy" a second time. These variables are coded to missing for those respondents.*)

(q18\_1) Whites:

|                    |   |   |   |   |   |                      |
|--------------------|---|---|---|---|---|----------------------|
| <b>Intelligent</b> |   |   |   |   |   | <b>Unintelligent</b> |
| 1                  | 2 | 3 | 4 | 5 | 6 | 7                    |

(q18\_2) Blacks:

|                    |   |   |   |   |   |                      |
|--------------------|---|---|---|---|---|----------------------|
| <b>Intelligent</b> |   |   |   |   |   | <b>Unintelligent</b> |
| 1                  | 2 | 3 | 4 | 5 | 6 | 7                    |

(q18\_3) Hispanic Americans:

|                    |   |   |   |   |   |                      |
|--------------------|---|---|---|---|---|----------------------|
| <b>Intelligent</b> |   |   |   |   |   | <b>Unintelligent</b> |
| 1                  | 2 | 3 | 4 | 5 | 6 | 7                    |

**q19:** Which one of the opinions expressed below best agrees with your view on the abortion issue?

- (1) By law, abortion should never be permitted.
- (2) The law should permit abortion only in cases of rape, incest or when the woman's life is in danger.
- (3) The law should permit abortion for reasons other than rape, incest, or danger to the woman's life, but only after the need for the abortion has been clearly established.
- (4) By law, a woman should always be able to obtain an abortion as a matter of personal choice.

**q20:** Recently, there has been a good deal of discussion about marriages and other legal relationships between same-sex couples. Which of the following statements comes closest to your view of the **proper legal status of marriage**?

- (1) The law should define marriage only as a union between one man and one woman.
- (2) The law should define marriage as a union between one man and one woman, but recognize legal agreements between same-sex couples.
- (3) The law should define marriage as a union between two people regardless of their gender.

**q21:** Some people believe that we should spend much more money for defense. Others feel that defense spending should be greatly decreased. Where would you place yourself on this scale? (*Sliding scales between 1 and 7, only whole numbers for mail respondents.*)

**Greatly increase  
defense spending**

**Greatly decrease  
defense spending**

|   |   |   |   |   |   |   |
|---|---|---|---|---|---|---|
| 1 | 2 | 3 | 4 | 5 | 6 | 7 |
|---|---|---|---|---|---|---|

## 2012 Convention Delegate Study

**q22:** Some people feel that the government in Washington should make every effort to **improve the social and economic position of Blacks**. Others feel that the government should **not make any special effort to help Blacks** because they should help themselves. (*Sliding scales between 1 and 7, only whole numbers for mail respondents.*)

**Government should  
help blacks**

1

2

3

4

5

6

**Blacks should help  
themselves**

7

**q23:** Some people think the government should **provide fewer services**, even in areas such as health and education in order to reduce spending. Other people feel it is important for the government to **provide many more services** even if it means an increase in spending. Where would you place yourself on this scale? (*Sliding scales between 1 and 7, only whole numbers for mail respondents.*)

**Government provide  
many fewer services,  
reduce spending a lot**

1

2

3

4

5

6

**Government provide  
many more services,  
increase spending a lot**

7

**q24:** Some people think the government should provide a public health insurance plan for all Americans. Other people think Americans should be responsible for their own health insurance plans. (*Sliding scales between 1 and 7, only whole numbers for mail respondents.*)

**The government should  
provide a public health  
insurance plan for all  
Americans.**

**All Americans should be  
responsible for their own health  
insurance plans.**

-----/-----

**q25=1 for all respondents reaching this point of survey**

We're interested in understanding how you think about achieving your goals on issues of public policy. Think about the last time you worked on a project involving a policy issue. It may have been part of a broader party policy initiative, a ballot initiative or referendum, a part of a candidate campaign, or a policy issue of personal interest. Please tell us how much you disagree or agree with the following statements (1=Disagree strongly, 2=Disagree, 3=Neither disagree nor agree, 4=Agree, 5=Agree strongly)

**q26\_1:** I planned out *specific* expenditures and individual time commitments *before* I began the policy project.

**q26\_3:** My policy project came from long term planning rather than a target of opportunity

**q26\_4:** Initially, I was careful not to commit more resources (money, people, or time) than I could afford to lose.

**q26\_6:** I built coalitions with other groups before embarking on the policy project

**q26\_7:** I use input from other groups or individuals when determining strategy

**q26\_8:** I looked for a target of opportunity that fit into my overall policy goals.

**q26\_9:** I adapted the strategies I pursued to fit the resources I had on hand

**q26\_12:** I made sure to gain the support of legislative and regulatory decision makers before we went public with the policy project.

## **2012 Convention Delegate Study**

Please tell us how much you agree or disagree with the following statements.

|                                                                                                                                                                                  | (1)<br>Disagree<br>strongly | (2)<br>Disagree<br>slightly | (3) Neither<br>disagree nor<br>agree | (4) Agree<br>slightly    | (5) Agree<br>strongly    |
|----------------------------------------------------------------------------------------------------------------------------------------------------------------------------------|-----------------------------|-----------------------------|--------------------------------------|--------------------------|--------------------------|
| <b>(q27_1)</b> The federal government should make it more difficult for people to buy a gun than it is now.                                                                      | <input type="checkbox"/>    | <input type="checkbox"/>    | <input type="checkbox"/>             | <input type="checkbox"/> | <input type="checkbox"/> |
| <b>(q27_2)</b> Because of past discrimination, racial minorities should be given preference in hiring and promotion.                                                             | <input type="checkbox"/>    | <input type="checkbox"/>    | <input type="checkbox"/>             | <input type="checkbox"/> | <input type="checkbox"/> |
| <b>(q27_4)</b> One of the major threats to the future of the United States is illegal immigration                                                                                | <input type="checkbox"/>    | <input type="checkbox"/>    | <input type="checkbox"/>             | <input type="checkbox"/> | <input type="checkbox"/> |
| <b>(q27_7)</b> Government monitoring of electronic communications by private U.S. citizens is necessary to gain information about terrorist plans and to protect American lives. | <input type="checkbox"/>    | <input type="checkbox"/>    | <input type="checkbox"/>             | <input type="checkbox"/> | <input type="checkbox"/> |
| <b>(q27_9)</b> Religiously-affiliated institutions should be required to offer contraceptive coverage in their insurance plans.                                                  | <input type="checkbox"/>    | <input type="checkbox"/>    | <input type="checkbox"/>             | <input type="checkbox"/> | <input type="checkbox"/> |
| <b>(q27_10)</b> In order for the U.S. to fund government obligations, it is important that Congress periodically raise the federal debt ceiling.                                 | <input type="checkbox"/>    | <input type="checkbox"/>    | <input type="checkbox"/>             | <input type="checkbox"/> | <input type="checkbox"/> |

Please tell us how you feel about the following statements (1=Disagree strongly, 2=Disagree slightly, 3=Neither disagree nor agree, 4=Agree slightly, 5=Agree strongly)

**(q28\_1)** Irish, Italians, Jewish and many other minorities overcame prejudice and worked their way up. Blacks should do the same without any special favors.

**(q28\_2)** Generations of slavery and discrimination have created conditions that make it difficult for blacks to work their way out of the lower class.

**(q28\_3)** Over the past few years, blacks have gotten less than they deserve.

**(q28\_4)** It's really a matter of some people not trying hard enough; if blacks would only try harder they could be just as well off as whites.

## **2012 Convention Delegate Study**

We are interested in whether you are a member of any of the following organizations or associations. Please check the box for each type of group that you are a member of (Each variable = 1 if chosen)

|               |                                                                                                                                                            | <b>Member</b>            |
|---------------|------------------------------------------------------------------------------------------------------------------------------------------------------------|--------------------------|
| <b>q29_1</b>  | Conservative religious groups (e.g. Family Research Council, Concerned Women for America, Christian Coalition)                                             | <input type="checkbox"/> |
| <b>q29_2</b>  | Liberal Religious Groups (e.g. Interfaith Alliance, Call to Renewal)                                                                                       | <input type="checkbox"/> |
| <b>q29_3</b>  | Teacher's Associations or Unions (e.g. NEA, AFT)                                                                                                           | <input type="checkbox"/> |
| <b>q29_4</b>  | Pro-Life groups                                                                                                                                            | <input type="checkbox"/> |
| <b>q29_5</b>  | Pro-Choice groups                                                                                                                                          | <input type="checkbox"/> |
| <b>q29_6</b>  | Ethnic or racial associations or groups (e.g. LULAC, NAACP)                                                                                                | <input type="checkbox"/> |
| <b>q29_7</b>  | Environmental groups (e.g. The Sierra Club, Greenpeace)                                                                                                    | <input type="checkbox"/> |
| <b>q29_8</b>  | Civil Liberties groups (e.g. ACLU)                                                                                                                         | <input type="checkbox"/> |
| <b>q29_9</b>  | Liberal Political Advocacy or Candidate Support groups<br>(e.g. NOW, People for the American Way, Move-On.org, EMILY's List)                               | <input type="checkbox"/> |
| <b>q29_11</b> | Conservative Political Advocacy or Candidate Support groups<br>(e.g. American Conservative Union, Concerned Women for America, Club for Growth, Tea Party) | <input type="checkbox"/> |
| <b>q29_13</b> | Gun owner's associations (e.g. NRA)                                                                                                                        | <input type="checkbox"/> |
| <b>q29_14</b> | LGBT groups (e.g. Human Rights Campaign)                                                                                                                   | <input type="checkbox"/> |
| <b>q29_15</b> | Professional or Occupational groups (e.g. Business group, Chamber of Commerce, Professional Associations, etc.)                                            | <input type="checkbox"/> |

**q30:** Of the groups that you are a member of, which of the following is most important to you when you make political decisions? *All groups that R selected for q29 (Membership) would appear on screen with a checkbox next to them. Respondents who skip q29 would not get this question asked of them.*

|    |                                                                                                                                                            |
|----|------------------------------------------------------------------------------------------------------------------------------------------------------------|
| 1  | Conservative religious groups (e.g. Family Research Council, Concerned Women for America, Christian Coalition)                                             |
| 2  | Liberal Religious Groups (e.g. Interfaith Alliance, Call to Renewal)                                                                                       |
| 3  | Teacher's Associations or Unions (e.g. NEA, AFT)                                                                                                           |
| 4  | Pro-Life groups                                                                                                                                            |
| 5  | Pro-Choice groups                                                                                                                                          |
| 6  | Ethnic or racial associations or groups (e.g. LULAC, NAACP)                                                                                                |
| 7  | Environmental groups (e.g. The Sierra Club, Greenpeace)                                                                                                    |
| 8  | Civil Liberties groups (e.g. ACLU)                                                                                                                         |
| 9  | Liberal Political Advocacy or Candidate Support groups<br>(e.g. NOW, People for the American Way, Move-On.org, EMILY's List)                               |
| 10 | Conservative Political Advocacy or Candidate Support groups<br>(e.g. American Conservative Union, Concerned Women for America, Club for Growth, Tea Party) |
| 11 | Gun owner's associations (e.g. NRA)                                                                                                                        |
| 12 | LGBT groups (e.g. Human Rights Campaign)                                                                                                                   |
| 13 | Professional or Occupational groups (e.g. Business group, Chamber of Commerce, Professional Associations, etc.)                                            |



## 2012 Convention Delegate Study

### q31–q46: Greg’s experiment

Respondents will randomly receive **one** of the following four treatments or be assigned to the control group. The name of the group that R just indicated as most important and the name of their political party will appear on the screen.

*Control Group(Party & Group Agree)* - Now, I’d like you to imagine that there is a contested \_\_\_\_\_ (your party) Party primary for state legislature with two qualified candidates, Michael Garnett and Richard Pierce. **Leaders of the \_\_\_\_\_ (your party pops up here) Party and leaders of the group you identified as being most important above ( \_\_\_\_\_ ) (category pops up here) have endorsed Richard Pierce.**

*Treatment A (Party & Group Differ on Candidates)* - Now, I’d like you to imagine that there is a contested \_\_\_\_\_ (your party) Party primary for state legislature with two qualified candidates, Michael Garnett and Richard Pierce. **Leaders of the \_\_\_\_\_ (your party pops up here) Party have endorsed Richard Pierce, while leaders of the group you identified as being most important above ( \_\_\_\_\_ ) (category pops up here) have endorsed Michael Garnett.**

*Treatment B (Party Endorses, Group Stays Out)* - Now, I’d like you to imagine that there is a contested \_\_\_\_\_ (your party) Party primary for state legislature with two qualified candidates, Michael Garnett and Richard Pierce. **Leaders of the \_\_\_\_\_ (your party pops up here) Party have endorsed Richard Pierce, while leaders of the group you identified as being most important above ( \_\_\_\_\_ ) (category pops up here) have not made an endorsement in the race.**

*Treatment C (Party Stays Out, Group Endorses)* - Now, I’d like you to imagine that there is a contested \_\_\_\_\_ (your party) Party primary for state legislature with two qualified candidates, Michael Garnett and Richard Pierce. **. Leaders of the \_\_\_\_\_ (your party pops up here) Party have decided not to make an endorsement in the race, while leaders of the group you identified as being most important above ( \_\_\_\_\_ ) (category pops up here) have endorsed Richard Pierce.**

### c. Follow-Up Questions

i. Are you more likely to vote for Michael Garnett or Richard Pierce? *(with sliding scale)*

Much more likely to vote for Garnett \_\_\_\_\_ Much more likely to vote for Pierce

ii. Are you more likely to contribute money to or volunteer for Michael Garnett or Richard Pierce? *(with sliding scale)*

Much more likely to contribute to/volunteer for Garnett \_\_\_\_\_ Much more likely to contribute to/volunteer for Pierce

## **2012 Convention Delegate Study**

Please indicate your **feelings toward** each of the following **groups** and **political figures** on what we call a "feeling thermometer." Here's how it works. If you don't feel particularly warm or cold toward a group or person, then you should place them in the middle, at the 50 degree mark. If you have a warm feeling, or feel favorable toward them, you would give them a score somewhere between 50 and 100 degrees, depending on how warm your feeling is toward that person or group. On the other hand, if you don't feel very favorable toward a person or group – that is, if you don't care much for them – then you would place them somewhere between 0 and 50 degrees. Remember, 50 degrees means you feel neutral. *(Sliding scale between 0 and 100 for online respondents, mail respondents were asked to choose one of the ten-degree marks below)*

|               |                           | <b>Cold</b> |     |     |     |     | <b>Neutral</b> |     |     |     |     | <b>Warm</b> |
|---------------|---------------------------|-------------|-----|-----|-----|-----|----------------|-----|-----|-----|-----|-------------|
| <b>q47_1</b>  | Feminists                 | 0°          | 10° | 20° | 30° | 40° | 50°            | 60° | 70° | 80° | 90° | 100°        |
| <b>q47_3</b>  | Christian fundamentalists | 0°          | 10° | 20° | 30° | 40° | 50°            | 60° | 70° | 80° | 90° | 100°        |
| <b>q47_4</b>  | Gay men and lesbians      | 0°          | 10° | 20° | 30° | 40° | 50°            | 60° | 70° | 80° | 90° | 100°        |
| <b>q47_6</b>  | Labor unions              | 0°          | 10° | 20° | 30° | 40° | 50°            | 60° | 70° | 80° | 90° | 100°        |
| <b>q47_9</b>  | Big business              | 0°          | 10° | 20° | 30° | 40° | 50°            | 60° | 70° | 80° | 90° | 100°        |
| <b>q47_13</b> | Tea Party                 | 0°          | 10° | 20° | 30° | 40° | 50°            | 60° | 70° | 80° | 90° | 100°        |
| <b>q47_14</b> | Occupy Wall Street        | 0°          | 10° | 20° | 30° | 40° | 50°            | 60° | 70° | 80° | 90° | 100°        |
| <b>q47_15</b> | Mormons                   | 0°          | 10° | 20° | 30° | 40° | 50°            | 60° | 70° | 80° | 90° | 100°        |
| <b>q47_16</b> | Atheists                  | 0°          | 10° | 20° | 30° | 40° | 50°            | 60° | 70° | 80° | 90° | 100°        |
| <b>q47_17</b> | Muslims                   | 0°          | 10° | 20° | 30° | 40° | 50°            | 60° | 70° | 80° | 90° | 100°        |

## **2012 Convention Delegate Study**

Please tell us how much you agree with each of the following statements concerning **women and men in politics** (*Choose one in each row*).

|              |                                                                                                                                        | (1) Disagree<br>strongly | (2) Disagree<br>moderately | (3) Disagree<br>slightly | (4) Agree<br>slightly | (5) Agree<br>moderately | (6) Agree<br>strongly |
|--------------|----------------------------------------------------------------------------------------------------------------------------------------|--------------------------|----------------------------|--------------------------|-----------------------|-------------------------|-----------------------|
| <b>q48_1</b> | Women are taught not to want political careers.                                                                                        | <input type="radio"/>    | <input type="radio"/>      | <input type="radio"/>    | <input type="radio"/> | <input type="radio"/>   | <input type="radio"/> |
| <b>q48_2</b> | Women are underrepresented among political leaders because they have fewer opportunities than men to prepare for leadership positions. | <input type="radio"/>    | <input type="radio"/>      | <input type="radio"/>    | <input type="radio"/> | <input type="radio"/>   | <input type="radio"/> |
| <b>q48_3</b> | It is almost impossible to be a good wife and mother and hold public office too.                                                       | <input type="radio"/>    | <input type="radio"/>      | <input type="radio"/>    | <input type="radio"/> | <input type="radio"/>   | <input type="radio"/> |
| <b>q48_4</b> | Most men in the party organization try to keep women out of leadership roles.                                                          | <input type="radio"/>    | <input type="radio"/>      | <input type="radio"/>    | <input type="radio"/> | <input type="radio"/>   | <input type="radio"/> |
| <b>q48_5</b> | Many people will not vote for women candidates.                                                                                        | <input type="radio"/>    | <input type="radio"/>      | <input type="radio"/>    | <input type="radio"/> | <input type="radio"/>   | <input type="radio"/> |
| <b>q48_6</b> | Women who seek political career often find they are not taken seriously.                                                               | <input type="radio"/>    | <input type="radio"/>      | <input type="radio"/>    | <input type="radio"/> | <input type="radio"/>   | <input type="radio"/> |
| <b>q48_7</b> | Most men are better suited emotionally for politics than are most women.                                                               | <input type="radio"/>    | <input type="radio"/>      | <input type="radio"/>    | <input type="radio"/> | <input type="radio"/>   | <input type="radio"/> |
| <b>q48_8</b> | Women don't support other women who run for political office.                                                                          | <input type="radio"/>    | <input type="radio"/>      | <input type="radio"/>    | <input type="radio"/> | <input type="radio"/>   | <input type="radio"/> |

**q49:** Who did you most prefer as your party's nominee for president in 2012?

### **Republicans**

- ☐ Michele Bachmann (1)
- ☐ Herman Cain (2)
- ☐ Newt Gingrich (3)
- ☐ Jon Huntsman (4)
- ☐ Ron Paul (5)
- ☐ Rick Perry (6)
- ☐ Mitt Romney (7)
- ☐ Rick Santorum (8)
- ☐ Someone else \_\_\_\_\_ (9)

### **Democrats**

- ☐ Barack Obama (11)
- ☐ Someone else \_\_\_\_ (12)

*Textbox responses for codes 9 and 12 are in q49\_text*

## **2012 Convention Delegate Study**

**q50:** Are you male or female?

- ☐ Male (1)
- ☐ Female (2)

Which of the following best describes you? (Separate variables for each category, coded 1 if respondent chose)

**q51\_1:** White, non-Hispanic

**q51\_4:** American Indian/Native American

**q51\_2:** Hispanic

**q51\_5:** Asian

**q51\_3:** African-American/Black

**q51\_6:** Other (*Textbox responses in q51\_6\_text*)

**q52:** In what year were you born? 19 \_\_

**q53:** What is your current marital status? Are you:

- ☐ Single, never married (1)
- ☐ Married (2)
- ☐ Separated (3)
- ☐ Divorced (4)
- ☐ Widowed (5)

**q54:** What is the highest level of education that you completed?

- ☐ High school or less (1)
- ☐ Some college/Vocational training (2)
- ☐ College graduate (3)
- ☐ Some post graduate training (4)
- ☐ Post-graduate degree (5)

**q55:** What is your present religion, if any? (*Please be as specific as possible. e.g. Southern Baptist, Presbyterian Church in the USA, Disciples of Christ, Reform Jew, None*):

---

In terms of religion, do any of the following terms describe you? (*Check all that apply*)

(*Each label a separate variable, coded 1 if chosen by respondent*)

|              |                          |               |                              |
|--------------|--------------------------|---------------|------------------------------|
| <b>q56_1</b> | progressive              | <b>q56_8</b>  | humanist                     |
| <b>q56_2</b> | traditional              | <b>q56_9</b>  | secular                      |
| <b>q56_3</b> | ecumenical               | <b>q56_10</b> | atheist                      |
| <b>q56_4</b> | mainline                 | <b>q56_11</b> | fundamentalist               |
| <b>q56_5</b> | charismatic/Pentecostal  | <b>q56_12</b> | born again/evangelical       |
| <b>q56_6</b> | deist                    | <b>q56_13</b> | agnostic                     |
| <b>q56_7</b> | non-traditional believer | <b>q56_14</b> | spiritual, but not religious |

## **2012 Convention Delegate Study**

**q57:** How often do you **attend** worship services?

- |                        |                           |
|------------------------|---------------------------|
| (1) Never              | (4) Once or twice a month |
| (2) Seldom             | (5) Once a week           |
| (3) A few times a year | (6) More than once a week |

**q58:** Which comes **closest** to your view of the Scriptures:

- (1) A good book, but not the word of God
- (2) The inspired word of God, but it contains human errors.
- (3) The inspired word of God, with no errors, but not to be taken literally.
- (4) The actual word of God, to be taken literally word for word.

**q59:** How much **guidance** does your religious provide in your day-to-day living?

- (1) No guidance
- (2) Some guidance
- (3) Quite a bit of guidance
- (4) A great deal of guidance

**q60=1 for all respondents making it this far in the survey**

Now we would like to ask you some questions about the religion of the 2012 presidential candidates.

**q61:** Do you happen to know what Mitt Romney's religion is?

- (1) Protestant
- (2) Catholic
- (3) Jewish
- (4) Muslim
- (5) Mormon
- (6) Not religious
- (7) Something else [TEXTBOX, response in q61\_text]

**q62:** Do you happen to know what Barack Obama's religion is?

- (1) Protestant
- (2) Catholic
- (3) Jewish
- (4) Muslim
- (5) Mormon
- (6) Not religious
- (7) Something else [TEXTBOX, response in q62\_text]

## **2012 Convention Delegate Study**

Please tell us how much you agree or disagree with the following statements:

|              |                                                                                             | <b>Disagree<br/>strongly (1)</b> | <b>Disagree (2)</b>   | <b>Neither<br/>Disagree<br/>nor Agree<br/>(3)</b> | <b>Agree (4)</b>      | <b>Agree<br/>Strongly<br/>(5)</b> |
|--------------|---------------------------------------------------------------------------------------------|----------------------------------|-----------------------|---------------------------------------------------|-----------------------|-----------------------------------|
| <b>q63_1</b> | Factual evidence from the natural world is the source of true beliefs.                      | <input type="radio"/>            | <input type="radio"/> | <input type="radio"/>                             | <input type="radio"/> | <input type="radio"/>             |
| <b>q63_3</b> | The great works of philosophy and science are the best source of truth, wisdom, and ethics. | <input type="radio"/>            | <input type="radio"/> | <input type="radio"/>                             | <input type="radio"/> | <input type="radio"/>             |
| <b>q63_4</b> | It is hard to live a good life based on reason and facts alone                              | <input type="radio"/>            | <input type="radio"/> | <input type="radio"/>                             | <input type="radio"/> | <input type="radio"/>             |
| <b>q63_5</b> | To understand the world, we must free our minds from old traditions and beliefs.            | <input type="radio"/>            | <input type="radio"/> | <input type="radio"/>                             | <input type="radio"/> | <input type="radio"/>             |
| <b>q63_6</b> | Values are more important than factual evidence in making moral decisions                   | <input type="radio"/>            | <input type="radio"/> | <input type="radio"/>                             | <input type="radio"/> | <input type="radio"/>             |

**q64:** Please indicate your approximate before tax annual family income in 2012.

- (1) \$29,999 or less
- (2) \$30,000 to \$52,499
- (3) \$52,500 to \$74,999
- (4) \$75,000 to \$124,999
- (5) \$125,000 to \$250,000
- (6) Over \$250,000

**q65:** In what state do you live? (state numerical codes)

**q66:** How would you describe the area in which you live?

- 1) large city,
- 2) suburbs of large city,
- 3) small/medium city,
- 4) suburbs of small/medium city
- 5) small town/rural
